# Supplementary material for: A crowd of BashTheBug volunteers reproducibly and accurately measure the minimum inhibitory concentrations of 13 antitubercular drugs from photographs of 96-well broth microdilution plates
Source: eLife journal article supplement (doi:10.7554/elife.75046), 2022-05-19

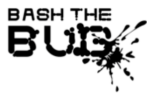

## Welcome to Bash the Bug!

We need you to help us identify which antibiotics are effective against Tuberculosis!

Read this tutorial for a quick explanation of what to do.

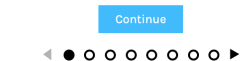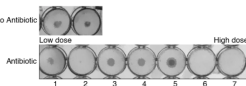

### Option 2

If there is something unusual that doesn't make sense; in these cases, please select **"Cannot classify"**.

This includes:

- **Growth** in one of the wells that **looks very different** to all the others (could be contamination)
- **Inconsistent growth** e.g. the bacteria grows in a well with a high dose of antibiotic but isn't growing in the low dose wells (this probably means something is wrong with the plate again). The above example shows this
- **You can't decide if there is growth or not.** The bacteria just might not grow that well which can make it hard to tell if there is growth, or it is something else, like an air

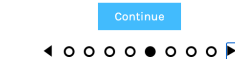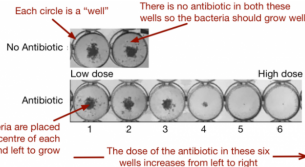

### What am I looking at?

Each image shows a series of circular 'wells'.

The **top two wells contain No Antibiotic**. We include these so you can see how well the bacteria grows in the absence of any antibiotic.

Below these two wells you'll see a **series of five to ten wells**. Each of these wells contains an increasing dose of antibiotic as we move from left to right.

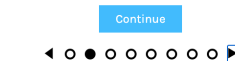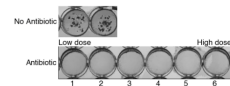

### Option 3

The second option is for cases where there is **"No Growth in wells 1-6"** (as illustrated in the image above). This is presumably because the antibiotic is effective at killing the bacteria at all doses.

Sometimes it can look as if there is 'something' in the wells, but you won't be sure if it is growth or not. Here, the two **No Antibiotic wells** are useful as these give you an idea of what growth looks like for this bacteria. **If what you see is very different** and much, much smaller, it is probably some sediment or something else; **you can assume it isn't bacterial growth**. For examples of common artefacts consult the Field Guide, accessed by the tab on the right of the page.

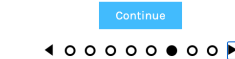

### How do I make the image bigger?

If the wells are too small, **you can zoom** into the image using the **"+" button to the right** of the image. Alternatively, many browsers let you enlarge a web page if you press Cntrl (CMD on a Mac) and "+".

The small half-moon symbol below the image lets you invert the colours, which some people find helpful.

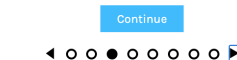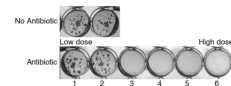

### Options 4-8

These options are for cases where **as the dose of antibiotic is increased, a point is reached where it is enough to prevent the bacteria growing**. In other words, as we move along the wells from left to right, the bacteria will perhaps grow in the first few, but after a particular well there will be no growth; select the option with **the number of the first well where there is no bacterial growth**. I'd say this is the third well in the example above.

Sometimes the bacteria grow less and less well as the dose of antibiotic increases until we reach a "No Growth" well, sometimes the growth looks pretty similar and suddenly the bacteria stop growing.

If the **bacteria start growing again** at higher doses of Antibiotic that indicates

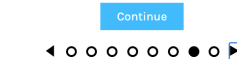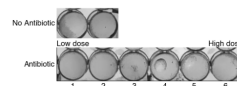

### What do you need me to do?

You'll be asked a multiple-choice question. For an image like the one above with six wells, the question has **nine options**, and you only need to **pick one** option. We will go through each of the possible options now.

### Option 1

If you can't see any bacterial growth in **one or both** of the No Antibiotic wells (as illustrated in the image above) this indicates there is a problem with the plate.

For cases such as this, pick : **"No Growth in either of the "No Antibiotic" wells**

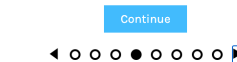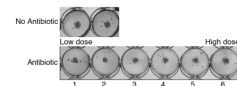

### Option 9

Lastly, choose this if there is **"Growth in all wells 1-6"** (as illustrated in the image above). In this case, the antibiotic isn't effective at any of the doses used, and so the bacteria grows in all the wells.

As before if you are unsure whether there is bacterial growth in a well, compare to how the bacteria has grown in the two No Antibiotic wells.

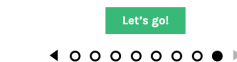

Supplement: supp [file elife-75046-supp-v2.zip › elife_poa_e75046_Figure_1_figure_supplement_4.pdf]
