# Supplementary material for: A crowd of BashTheBug volunteers reproducibly and accurately measure the minimum inhibitory concentrations of 13 antitubercular drugs from photographs of 96-well broth microdilution plates
Source: eLife journal article supplement (doi:10.7554/elife.75046), 2022-05-19
Supplement: supp [file elife-75046-supp-v2.zip]

Archive with 18 entries (18 files):
- elife_poa_e75046_Supplementary_File_1.tex
- elife_poa_e75046_Figure_1_figure_supplement_1.pdf
- elife_poa_e75046_Figure_1_figure_supplement_2.pdf
- elife_poa_e75046_Figure_1_figure_supplement_3.pdf
- elife_poa_e75046_Figure_1_figure_supplement_4.pdf
- elife_poa_e75046_Figure_2_figure_supplement_1.pdf
- elife_poa_e75046_Figure_3_figure_supplement_1.pdf
- elife_poa_e75046_Figure_4_figure_supplement_1.pdf
- elife_poa_e75046_Figure_4_figure_supplement_2.pdf
- elife_poa_e75046_Figure_4_figure_supplement_3.pdf
- elife_poa_e75046_Figure_4_figure_supplement_4.pdf
- elife_poa_e75046_Figure_4_figure_supplement_5.pdf
- elife_poa_e75046_Figure_5_figure_supplement_1.pdf
- elife_poa_e75046_Figure_6_figure_supplement_1.pdf
- elife_poa_e75046_Figure_6_figure_supplement_2.pdf
- elife_poa_e75046_Figure_6_figure_supplement_3.pdf
- elife_poa_e75046_Figure_6_figure_supplement_4.pdf
- elife_poa_e75046_Figure_6_figure_supplement_5.pdf
