# Supplementary material for: A crowd of BashTheBug volunteers reproducibly and accurately measure the minimum inhibitory concentrations of 13 antitubercular drugs from photographs of 96-well broth microdilution plates
Source: eLife journal article supplement (doi:10.7554/elife.75046), 2022-05-19

**A** after 7 days incubation

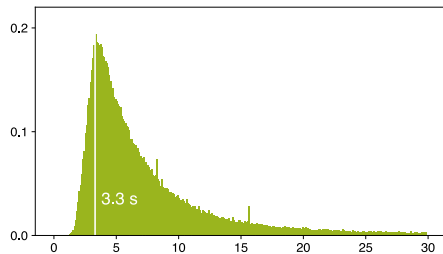

**B** after 10 days incubation

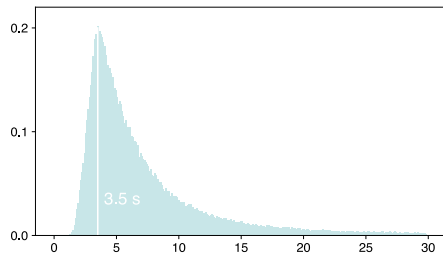

**C** after 14 days incubation

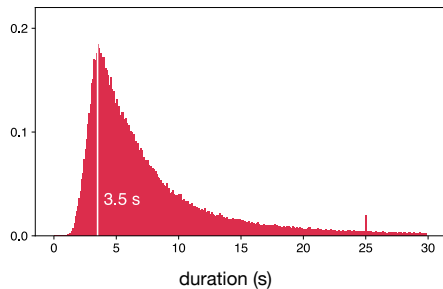

**D** after 21 days incubation

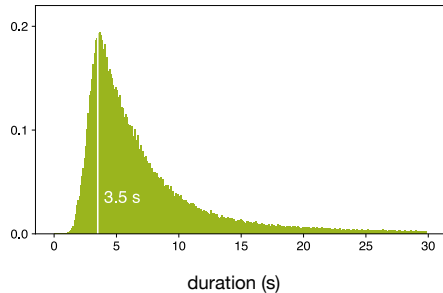

Supplement: supp [file elife-75046-supp-v2.zip › elife_poa_e75046_Figure_1_figure_supplement_2.pdf]
