# Supplementary material for: A crowd of BashTheBug volunteers reproducibly and accurately measure the minimum inhibitory concentrations of 13 antitubercular drugs from photographs of 96-well broth microdilution plates
Source: eLife journal article supplement (doi:10.7554/elife.75046), 2022-05-19

**A** accuracy after 14 days incubation for plates with  $\leq 10\%$  growth in the control wells

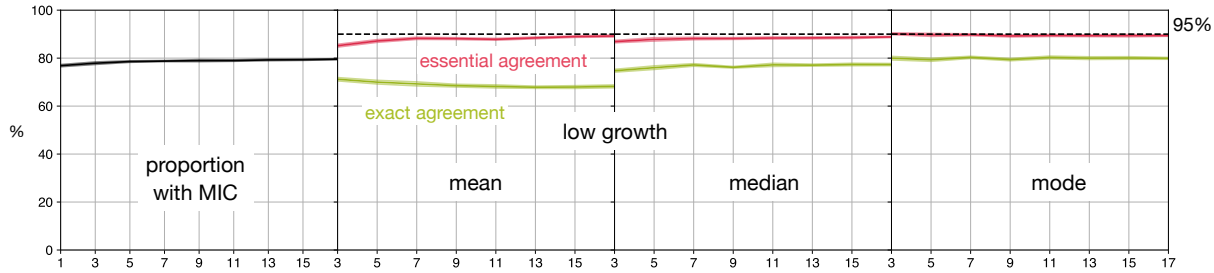

**B** .. and for plates with  $10\% < \text{growth} \leq 50\%$  in the control wells

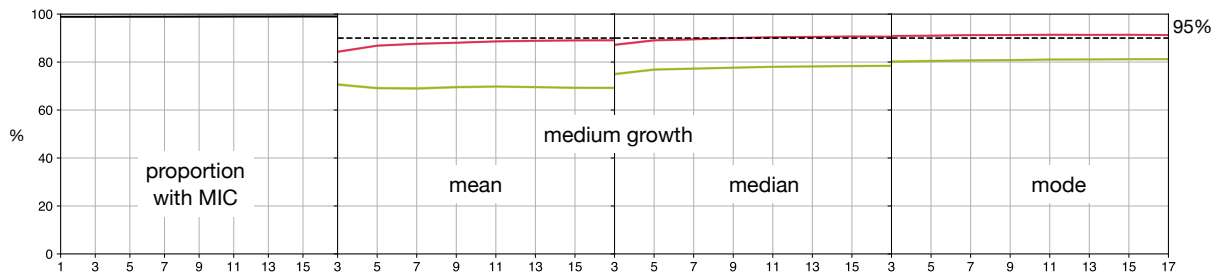

**C** .. and for plates with growth  $> 50\%$  in the control wells

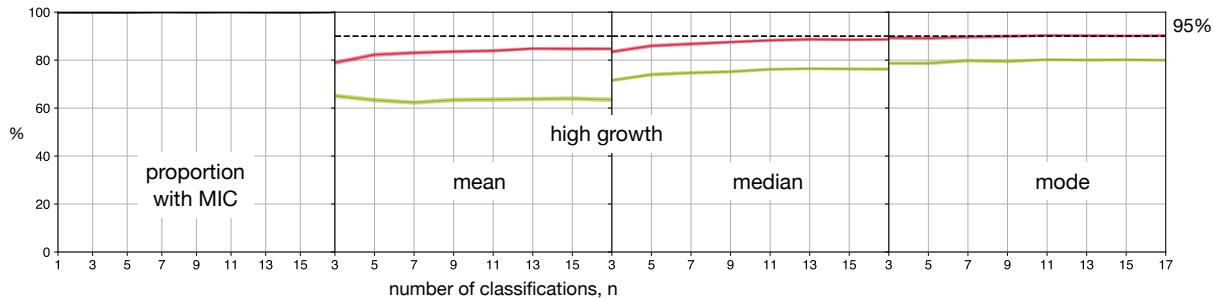

Supplement: supp [file elife-75046-supp-v2.zip › elife_poa_e75046_Figure_4_figure_supplement_5.pdf]
