# Supplementary material for: A crowd of BashTheBug volunteers reproducibly and accurately measure the minimum inhibitory concentrations of 13 antitubercular drugs from photographs of 96-well broth microdilution plates
Source: eLife journal article supplement (doi:10.7554/elife.75046), 2022-05-19

**A** reproducibility after 14 days incubation and n=17 classifications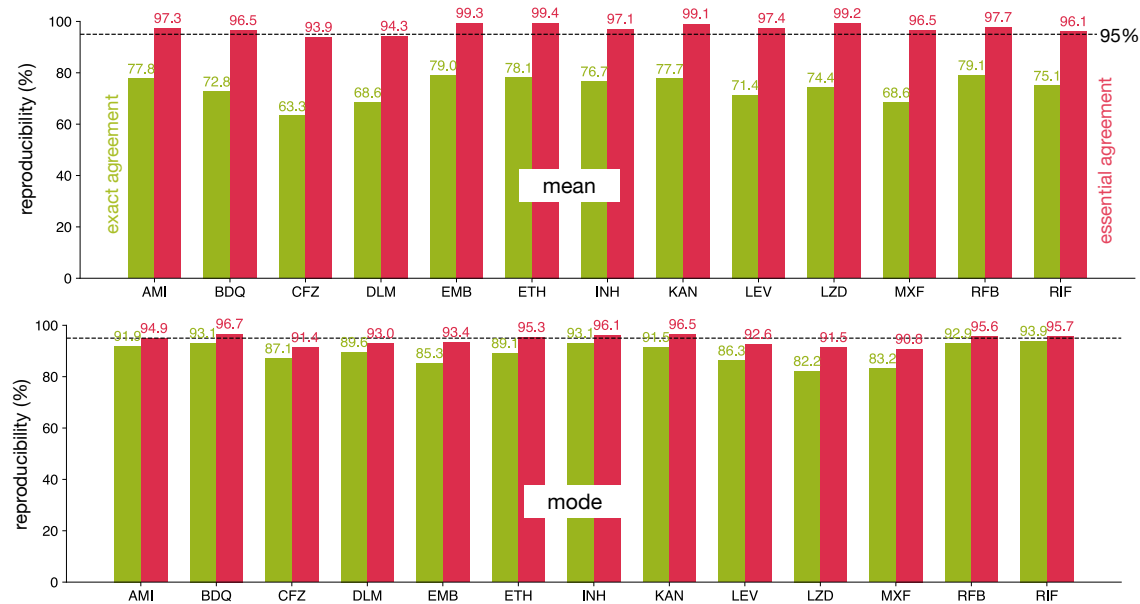**B** accuracy after 14 days incubation and n=17 classifications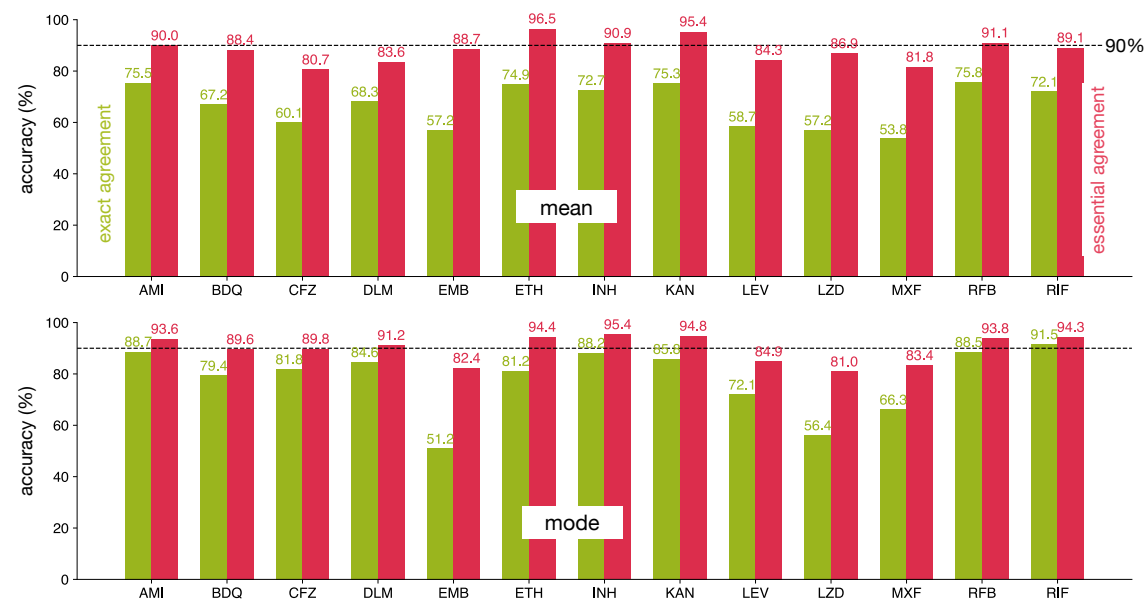

Supplement: supp [file elife-75046-supp-v2.zip › elife_poa_e75046_Figure_5_figure_supplement_1.pdf]
