# Supplementary material for: A crowd of BashTheBug volunteers reproducibly and accurately measure the minimum inhibitory concentrations of 13 antitubercular drugs from photographs of 96-well broth microdilution plates
Source: eLife journal article supplement (doi:10.7554/elife.75046), 2022-05-19
Supplement: supp [file elife-75046-supp-v2.zip › elife_poa_e75046_Supplementary_File_1.tex]

\documentclass[10pt,uspaper]{article}

\usepackage{texshade}
%\usepackage{setspace}
\linespread{1.2}

% Define the packages
\usepackage[pdftex]{graphicx}

\usepackage{rotating}


% Allow subfigures
\usepackage{subfigure}
\usepackage{url}

\def\url@smallurlstyle{%
  \@ifundefined{selectfont}{\def\UrlFont{\sf}}{%
    \def\UrlFont{\tiny\ttfamily}}\Url@do
}

% Now actually use the newly defined style.
%\urlstyle{smallurl}

% Use Times as the font
%\usepackage[scaled=0.85]{helvet}
%\renewcommand{\familydefault}{\sfdefault}
%\fontfamily{phv}\selectfont
%\usepackage{cmbright}
\usepackage{mathptmx}

\usepackage{amsmath}

\usepackage[small,compact]{titlesec}

%\bibliographystyle{/Users/fowler/Dropbox/documents/base/thesis10.bst}
\bibliographystyle{pnas}
%\bibliographystyle{achemso}

% Use numbered references
%\usepackage[numbers,super,sort&compress]{natbib}
\usepackage[super,sort&compress]{natbib}
\bibpunct{}{}{,}{s}{}{;}
%\usepackage{natbib}
\usepackage{longtable}
\usepackage{multirow}
\usepackage{booktabs}

\makeatletter
%\renewcommand{\fnum@figure}[1]{\textbf{\figurename~\thefigure} 
%	--- \sffamily}
\def\bibfont{\rmfamily\normalsize}
\def\@biblabel#1{#1.}
\renewenvironment{thebibliography}[1]{%
%     \section*{\refname}%
%      \@mkboth{\MakeUppercase\refname}{\MakeUppercase\refname}%
      \list{\@biblabel{\@arabic\c@enumiv}}%
            {\settowidth\labelwidth{\@biblabel{#1}}%
            \leftmargin\labelwidth
%            \advance\leftmargin\labelsep
%            \@openbib@code
%            \usecounter{enumiv}%
            \let\p@enumiv\@empty
            \renewcommand\theenumiv{\@arabic\c@enumiv}}%
%      \sloppy
%      \clubpenalty4000
      \@clubpenalty \clubpenalty
%      \widowpenalty4000%
      \sfcode`\.\@m}
     {\def\@noitemerr
       {\@latex@warning{Empty `thebibliography' environment}}%
      \endlist}
\def\bibsep{0.0pt}
\makeatother


\renewcommand{\thefootnote}{\fnsymbol{footnote}}
\renewcommand{\thefigure}{\arabic{figure}}
\makeatletter\renewcommand{\thefigure}{S\@arabic\c@figure}
\makeatletter\renewcommand{\thetable}{1\@alph\c@table}
\makeatletter\renewcommand{\theequation}{S\@arabic\c@equation}

\usepackage{color,hyperref}
\definecolor{darkblue}{rgb}{0.0,0.0,0.3}
\hypersetup{colorlinks,breaklinks,
            linkcolor=darkblue,urlcolor=darkblue,
            anchorcolor=darkblue,citecolor=darkblue}

% Define the page layout
\usepackage{geometry}
\geometry{tmargin=20mm,bmargin=20mm,lmargin=20mm,rmargin=20mm}
\geometry{foot=20mm}

% Allows URLs to be clicked in the PDF
\usepackage{hyperref}

\usepackage{caption}
\captionsetup[table]{name=Supplemental File}

\addtolength{\belowcaptionskip}{-50mm}
\addtolength{\textfloatsep}{-5mm}

% make the DOI's clickable
\providecommand{\doi}[1]{\href{http://dx.doi.org/#1}{doi:#1}}

% To allow hyperref and natbib sort&compress to both work
\usepackage{hypernat}

% my list of user commands
\newcommand{\bi}{\begin{itemize}}
\newcommand{\ei}{\end{itemize}}
\newcommand{\be}{\begin{enumerate}}
\newcommand{\ee}{\end{enumerate}}
\newcommand{\im}{\item}
\newcommand{\calph}{C$_{\alpha}$}
\newcommand{\plm}{$\pm$}
\newcommand{\degree}{\ensuremath{^\circ}}
\newcommand{\etal}{\textit{et al.}}
\newcommand{\rif}{rifampicin}
\newcommand{\mtb}{\emph{M. tuberculosis}}


\usepackage[blocks]{authblk}
\title{\emph{A crowd of BashTheBug volunteers reproducibly and accurately measure the minimum inhibitory concentrations of 13 antitubercular drugs from photographs of 96-well broth microdilution plates -- Supplemental Information}}

%\footnote{Shorter title:``BashTheBug: a crowd of volunteers accurately assesses the growth of \emph{Mycobacterium tuberculosis} on 96-well broth microdilution plates.''}.}}

\author[1]{Philip W Fowler\thanks{To whom correspondence should be addressed: philip.fowler@ndm.ox.ac.uk, @philipwfowler}} 
\affil[1]{Nuffield Department of Medicine, John Radcliffe Hospital, University of Oxford, Headley Way, Oxford, OX3 9DU, UK}
\author[1]{Carla Wright}
\author[2,3]{Helen Spiers}
\affil[2]{Zooniverse, Department of Physics, University of Oxford, Oxford, UK}
\affil[3]{Electron Microscopy Science Technology Platform, The Francis Crick Institute, London, UK}
\author[4]{Tingting Zhu} 
\affil[4]{Institute of Biomedical Engineering, University of Oxford, UK}
\author[5]{Elisabeth ML Baeten}
\affil[5]{Citizen Scientist, c/o Zooniverse, Department of Physics, University of Oxford, Oxford, UK}
\author[1]{Sarah W Hoosdally}
\author[1]{Ana Lu\'{i}za Gibertoni Cruz}
\author[1]{Aysha Roohi}
\author[4]{Samaneh Kouchaki} 
\author[1]{Timothy M Walker}
\author[1]{Timothy EA Peto}
\author[2]{Grant Miller}
\author[2]{Chris Lintott}
\author[4]{David Clifton} 
\author[1]{Derrick W Crook}
\author[1]{A Sarah Walker}
\author[ ]{The Zooniverse Volunteer Community}
\author[ ]{The CRyPTIC Consortium}


\date{}
\begin{document}

\maketitle
\clearpage


\begin{longtable}{rrr|cccccccc}
\caption{List of strains and their repeats tested by laboratory.}\label{table:S1}\\
\toprule
      &        & Lab &  A &  B &  C &  D &  E &  G &  H \\
EQA strain & Vial & Replicate &    &    &    &    &    &    &    \\
\midrule
\endhead
\midrule
\multicolumn{10}{r}{{Continued on next page}} \\
\midrule
\endfoot

\bottomrule
\endlastfoot
WHO-1 & CRY-19 & 0001 &  Y &  Y &  Y &  Y &  Y &  Y &  Y \\
      &        & 0002 &  Y &  Y &  Y &  Y &  Y &  Y &  Y \\
      & CRY-7 & 0001 &  Y &  Y &  Y &  Y &  - &  Y &  Y \\
      &        & 0002 &  Y &  Y &  Y &  Y &  - &  Y &  Y \\
WHO-10 & CRY-18 & 0001 &  Y &  Y &  Y &  - &  - &  Y &  Y \\
      &        & 0002 &  Y &  Y &  Y &  - &  - &  Y &  Y \\
WHO-11 & CRY-16 & 0001 &  Y &  Y &  Y &  Y &  Y &  Y &  Y \\
      &        & 0002 &  Y &  Y &  Y &  Y &  Y &  Y &  Y \\
WHO-12 & CRY-13 & 0001 &  Y &  Y &  Y &  - &  Y &  Y &  Y \\
      &        & 0002 &  Y &  Y &  Y &  - &  Y &  Y &  Y \\
      & CRY-8 & 0001 &  Y &  Y &  Y &  Y &  Y &  Y &  Y \\
      &        & 0002 &  Y &  Y &  Y &  Y &  Y &  Y &  Y \\
WHO-13 & CRY-10 & 0001 &  Y &  Y &  Y &  - &  Y &  Y &  Y \\
      &        & 0002 &  Y &  Y &  Y &  - &  Y &  Y &  Y \\
      & CRY-5 & 0001 &  Y &  - &  Y &  Y &  Y &  Y &  Y \\
      &        & 0002 &  Y &  - &  Y &  Y &  Y &  Y &  Y \\
WHO-14 & CRY-29 & 0001 &  Y &  Y &  Y &  - &  Y &  Y &  Y \\
      &        & 0002 &  Y &  Y &  Y &  - &  Y &  Y &  Y \\
      & CRY-6 & 0001 &  Y &  Y &  Y &  Y &  Y &  Y &  Y \\
      &        & 0002 &  Y &  Y &  Y &  Y &  Y &  Y &  Y \\
WHO-15 & CRY-2 & 0001 &  Y &  Y &  Y &  Y &  Y &  Y &  Y \\
      &        & 0002 &  Y &  Y &  Y &  Y &  Y &  Y &  Y \\
      & CRY-25 & 0001 &  Y &  Y &  Y &  - &  Y &  Y &  Y \\
      &        & 0002 &  Y &  Y &  Y &  - &  Y &  Y &  Y \\
WHO-16 & CRY-12 & 0001 &  Y &  Y &  Y &  Y &  Y &  Y &  Y \\
      &        & 0002 &  Y &  Y &  Y &  Y &  Y &  Y &  Y \\
      & CRY-24 & 0001 &  Y &  Y &  Y &  - &  Y &  Y &  Y \\
      &        & 0002 &  Y &  Y &  Y &  - &  Y &  Y &  Y \\
WHO-17 & CRY-14 & 0001 &  Y &  Y &  Y &  Y &  - &  Y &  Y \\
      &        & 0002 &  Y &  Y &  Y &  Y &  - &  Y &  Y \\
WHO-18 & CRY-20 & 0001 &  Y &  Y &  Y &  Y &  Y &  Y &  Y \\
      &        & 0002 &  Y &  Y &  Y &  Y &  Y &  Y &  Y \\
WHO-19 & CRY-23 & 0001 &  Y &  Y &  Y &  Y &  Y &  Y &  Y \\
      &        & 0002 &  Y &  Y &  Y &  Y &  - &  - &  Y \\
WHO-2 & CRY-26 & 0001 &  Y &  Y &  Y &  Y &  Y &  Y &  Y \\
      &        & 0002 &  Y &  Y &  Y &  Y &  Y &  Y &  Y \\
WHO-3 & CRY-30 & 0001 &  Y &  Y &  Y &  - &  Y &  Y &  Y \\
      &        & 0002 &  Y &  Y &  Y &  - &  Y &  Y &  Y \\
      & CRY-4 & 0001 &  Y &  Y &  Y &  Y &  Y &  Y &  Y \\
      &        & 0002 &  Y &  Y &  Y &  Y &  Y &  Y &  Y \\
WHO-4 & CRY-22 & 0001 &  Y &  - &  Y &  - &  Y &  Y &  Y \\
      &        & 0002 &  Y &  - &  Y &  - &  Y &  Y &  Y \\
      & CRY-9 & 0001 &  Y &  - &  Y &  Y &  Y &  Y &  Y \\
      &        & 0002 &  Y &  - &  Y &  Y &  Y &  Y &  Y \\
WHO-5 & CRY-15 & 0001 &  - &  Y &  Y &  Y &  Y &  Y &  Y \\
      &        & 0002 &  - &  Y &  Y &  Y &  Y &  Y &  Y \\
      & CRY-21 & 0001 &  Y &  Y &  Y &  - &  Y &  - &  Y \\
      &        & 0002 &  Y &  Y &  Y &  - &  Y &  Y &  Y \\
WHO-6 & CRY-11 & 0001 &  Y &  Y &  Y &  - &  Y &  Y &  Y \\
      &        & 0002 &  Y &  Y &  Y &  - &  Y &  Y &  Y \\
      & CRY-3 & 0001 &  Y &  Y &  Y &  - &  Y &  Y &  Y \\
      &        & 0002 &  Y &  Y &  Y &  - &  Y &  Y &  Y \\
      & H37rV & 0001 &  Y &  Y &  Y &  Y &  Y &  Y &  Y \\
      &        & 0002 &  Y &  Y &  Y &  Y &  Y &  Y &  Y \\
      &        & 0003 &  Y &  Y &  Y &  Y &  Y &  Y &  Y \\
      &        & 0004 &  Y &  Y &  Y &  Y &  Y &  Y &  Y \\
      &        & 0005 &  Y &  Y &  Y &  Y &  Y &  Y &  Y \\
      &        & 0006 &  Y &  Y &  Y &  Y &  Y &  Y &  Y \\
      &        & 0007 &  Y &  Y &  Y &  Y &  Y &  Y &  Y \\
      &        & 0008 &  Y &  Y &  Y &  Y &  Y &  Y &  Y \\
      &        & 0009 &  Y &  Y &  Y &  Y &  Y &  Y &  Y \\
      &        & 0010 &  Y &  Y &  Y &  Y &  Y &  Y &  Y \\
WHO-7 & CRY-1 & 0001 &  Y &  Y &  Y &  Y &  - &  Y &  Y \\
      &        & 0002 &  Y &  Y &  Y &  Y &  - &  Y &  Y \\
      & CRY-17 & 0001 &  Y &  Y &  Y &  - &  Y &  Y &  Y \\
      &        & 0002 &  Y &  Y &  Y &  - &  Y &  Y &  Y \\
WHO-8 & CRY-27 & 0001 &  Y &  Y &  Y &  Y &  Y &  Y &  Y \\
      &        & 0002 &  Y &  Y &  Y &  Y &  Y &  Y &  Y \\
WHO-9 & CRY-28 & 0001 &  Y &  Y &  Y &  Y &  Y &  Y &  Y \\
      &        & 0002 &  Y &  Y &  Y &  Y &  Y &  Y &  Y \\
      \\
\end{longtable}
Supplemental File 1a: List of strains and their repeats tested by laboratory.
\clearpage


\begin{table}
\begin{center}
\begin{tabular}{lrl}
\toprule
Classifications performed by volunteers &  Number of drug images & Proportion of drug images \\
\midrule
                             n $\le$ 14 &                      0 &                       0.0 \\
                                     15 &                      3 &                       0.0 \\
                                     16 &                   2659 &                       6.1 \\
                                     17 &                  34843 &                      79.8 \\
                                     18 &                   1841 &                       4.2 \\
                                     19 &                    924 &                       2.1 \\
                                     20 &                    601 &                       1.4 \\
                               21 or 22 &                    760 &                       1.7 \\
                           23, 24 or 25 &                    720 &                       1.6 \\
                        25 $<$ n $<$ 29 &                    854 &                       2.0 \\
                        30 $<$ n $<$ 39 &                    132 &                       0.3 \\
                        40 $<$ n $<$ 49 &                    108 &                       0.2 \\
                        50 $<$ n $<$ 74 &                    112 &                       0.3 \\
                        75 $<$ n $<$ 99 &                     26 &                       0.1 \\
                      100 $<$ n $<$ 149 &                     41 &                       0.1 \\
                      150 $<$ n $<$ 199 &                     25 &                       0.1 \\
                      200 $<$ n $<$ 299 &                     14 &                       0.0 \\
                      300 $<$ n $<$ 499 &                      8 &                       0.0 \\
\bottomrule
\end{tabular}
\caption[The number of classifications performed for each drug image]{\label{table:S2} The number of classifications performed for each drug image. The retirement limit on the Zooniverse platform was set to 17, however, a subset of images recieved many more classifications. }
\end{center}
\end{table}

\clearpage


\begin{table}
\begin{center}
\begin{tabular}{c|crrrr}
\toprule
   &        & Measurements & Classifications & Essential agreement & Exact agreement \\
Reading day & Reference dataset &              &                 &                     &                 \\
\midrule
\multirow{2}{*}{7} & Expert+AMyGDA &         5598 &           80197 &              85.2 \% &          68.7 \% \\
   & Expert &        12502 &          160102 &              81.7 \% &          59.9 \% \\
\cline{1-6}
\multirow{2}{*}{10} & Expert+AMyGDA &         5662 &           85912 &              86.1 \% &          73.1 \% \\
   & Expert &        12474 &          177315 &              82.7 \% &          63.2 \% \\
\cline{1-6}
\multirow{2}{*}{14} & Expert+AMyGDA &         6205 &          112163 &              86.4 \% &          74.6 \% \\
   & Expert &        12488 &          206353 &              83.3 \% &          65.3 \% \\
\cline{1-6}
\multirow{2}{*}{21} & Expert+AMyGDA &         6394 &          106144 &              88.2 \% &          78.9 \% \\
   & Expert &        12474 &          186624 &              85.8 \% &          71.1 \% \\
\bottomrule
\end{tabular}
\caption[Volunteers only agree with the Expert+AMyGDA reference dataset in 60-70\% of drug images.]{\label{table:S3} Individual volunteers only agree with the Expert+AMyGDA reference dataset in 60-70\% of drug images. The exact and essential agreement between individual volunteers and the reference Expert+AMyGDA dataset improves with the length of incubation. The Expert dataset is shown for comparision. }
\end{center}
\end{table}


\begin{table}
\begin{center}
\begin{tabular}{r|r}
\toprule
Dilution &        Agreement \\
\midrule
      NR & 43.9 $\pm$ 0.6 \% \\
       1 & 76.3 $\pm$ 0.4 \% \\
       2 & 43.5 $\pm$ 0.5 \% \\
       3 & 29.1 $\pm$ 0.6 \% \\
       4 & 31.4 $\pm$ 0.8 \% \\
       5 & 29.9 $\pm$ 0.8 \% \\
       6 & 31.6 $\pm$ 0.8 \% \\
       7 & 39.3 $\pm$ 1.0 \% \\
       8 & 52.6 $\pm$ 1.0 \% \\
       9 & 16.1 $\pm$ 2.6 \% \\
\bottomrule
\end{tabular}
\caption[The Expert and AMyGDA MICs are more likely to concur at smaller dilutions.]{\label{table:S4} The Expert and AMyGDA MICs are more likely to concur at smaller dilutions. The standard error of the mean is given.}
\end{center}
\end{table}

\clearpage

\footnotesize
\begin{table}
\begin{center}
\begin{tabular}{rr|p{1.8cm}|p{1.6cm}p{1.6cm}p{1.6cm}|p{1.6cm}p{1.6cm}p{1.6cm}}
\toprule
   &    &       Prop. with & \multicolumn{3}{c}{Exact Agreement (\%)} & \multicolumn{3}{c}{Essential Agreement (\%)} \\
   &    &         MIC (\%) &                 Mean &           Median &             Mode &                     Mean &           Median &             Mode \\
Reading day & $n$ &                  &                      &                  &                  &                          &                  &                  \\
\midrule
\multirow{9}{*}{7} & 1  &  62.6 $\pm$ 0.1  &      68.6 $\pm$ 0.1  &  68.6 $\pm$ 0.1  &  68.6 $\pm$ 0.1  &          82.6 $\pm$ 0.1  &  82.6 $\pm$ 0.1  &  82.6 $\pm$ 0.1  \\
   & 3  &  69.3 $\pm$ 0.1  &      61.7 $\pm$ 0.1  &  71.6 $\pm$ 0.1  &  75.2 $\pm$ 0.1  &          84.3 $\pm$ 0.1  &  86.0 $\pm$ 0.1  &  86.9 $\pm$ 0.1  \\
   & 5  &  71.8 $\pm$ 0.1  &      63.3 $\pm$ 0.1  &  76.9 $\pm$ 0.1  &  79.4 $\pm$ 0.1  &          89.5 $\pm$ 0.1  &  89.5 $\pm$ 0.1  &  89.1 $\pm$ 0.1  \\
   & 7  &  73.3 $\pm$ 0.1  &      65.5 $\pm$ 0.1  &  79.2 $\pm$ 0.1  &  82.1 $\pm$ 0.1  &          92.5 $\pm$ 0.1  &  91.0 $\pm$ 0.1  &  90.8 $\pm$ 0.1  \\
   & 9  &  74.4 $\pm$ 0.1  &      67.7 $\pm$ 0.1  &  81.5 $\pm$ 0.1  &  84.1 $\pm$ 0.1  &          94.0 $\pm$ 0.1  &  92.2 $\pm$ 0.1  &  91.7 $\pm$ 0.1  \\
   & 11 &  75.2 $\pm$ 0.1  &      69.8 $\pm$ 0.1  &  82.8 $\pm$ 0.1  &  85.4 $\pm$ 0.1  &          95.2 $\pm$ 0.1  &  93.0 $\pm$ 0.1  &  92.6 $\pm$ 0.1  \\
   & 13 &  75.8 $\pm$ 0.1  &      71.6 $\pm$ 0.1  &  84.2 $\pm$ 0.1  &  86.7 $\pm$ 0.1  &          96.1 $\pm$ 0.1  &  93.6 $\pm$ 0.1  &  93.2 $\pm$ 0.1  \\
   & 15 &  76.2 $\pm$ 0.1  &      72.6 $\pm$ 0.1  &  85.1 $\pm$ 0.1  &  87.8 $\pm$ 0.1  &          96.7 $\pm$ 0.1  &  94.2 $\pm$ 0.1  &  93.7 $\pm$ 0.1  \\
   & 17 &  76.4 $\pm$ 0.1  &      73.6 $\pm$ 0.1  &  85.4 $\pm$ 0.1  &  87.9 $\pm$ 0.1  &          97.2 $\pm$ 0.1  &  94.3 $\pm$ 0.1  &  93.8 $\pm$ 0.1  \\
\cline{1-9}
\multirow{9}{*}{10} & 1  &  75.5 $\pm$ 0.1  &      68.7 $\pm$ 0.1  &  68.7 $\pm$ 0.1  &  68.7 $\pm$ 0.1  &          82.9 $\pm$ 0.1  &  82.9 $\pm$ 0.1  &  82.9 $\pm$ 0.1  \\
   & 3  &  82.1 $\pm$ 0.1  &      62.5 $\pm$ 0.1  &  72.1 $\pm$ 0.1  &  75.8 $\pm$ 0.1  &          84.9 $\pm$ 0.1  &  85.9 $\pm$ 0.1  &  87.4 $\pm$ 0.1  \\
   & 5  &  85.3 $\pm$ 0.1  &      63.7 $\pm$ 0.1  &  77.3 $\pm$ 0.1  &  79.8 $\pm$ 0.1  &          89.9 $\pm$ 0.1  &  89.4 $\pm$ 0.1  &  89.6 $\pm$ 0.1  \\
   & 7  &  86.6 $\pm$ 0.1  &      66.1 $\pm$ 0.1  &  79.4 $\pm$ 0.1  &  82.4 $\pm$ 0.1  &          92.7 $\pm$ 0.1  &  90.7 $\pm$ 0.1  &  90.8 $\pm$ 0.1  \\
   & 9  &  87.5 $\pm$ 0.1  &      68.2 $\pm$ 0.1  &  81.5 $\pm$ 0.1  &  84.2 $\pm$ 0.1  &          94.1 $\pm$ 0.1  &  91.8 $\pm$ 0.1  &  91.7 $\pm$ 0.1  \\
   & 11 &  88.2 $\pm$ 0.1  &      70.1 $\pm$ 0.1  &  82.9 $\pm$ 0.1  &  85.4 $\pm$ 0.1  &          95.3 $\pm$ 0.1  &  92.6 $\pm$ 0.1  &  92.3 $\pm$ 0.1  \\
   & 13 &  88.7 $\pm$ 0.1  &      71.8 $\pm$ 0.1  &  84.1 $\pm$ 0.1  &  86.5 $\pm$ 0.1  &          96.1 $\pm$ 0.1  &  93.2 $\pm$ 0.1  &  93.0 $\pm$ 0.1  \\
   & 15 &  89.1 $\pm$ 0.1  &      73.1 $\pm$ 0.1  &  84.9 $\pm$ 0.1  &  87.3 $\pm$ 0.1  &          96.8 $\pm$ 0.1  &  93.6 $\pm$ 0.1  &  93.3 $\pm$ 0.1  \\
   & 17 &  89.9 $\pm$ 0.1  &      74.0 $\pm$ 0.1  &  85.5 $\pm$ 0.1  &  88.0 $\pm$ 0.1  &          97.2 $\pm$ 0.1  &  93.9 $\pm$ 0.1  &  93.7 $\pm$ 0.1  \\
\cline{1-9}
\multirow{9}{*}{14} & 1  &  76.5 $\pm$ 0.1  &      70.4 $\pm$ 0.1  &  70.4 $\pm$ 0.1  &  70.4 $\pm$ 0.1  &          83.2 $\pm$ 0.1  &  83.2 $\pm$ 0.1  &  83.2 $\pm$ 0.1  \\
   & 3  &  83.9 $\pm$ 0.1  &      63.9 $\pm$ 0.1  &  73.8 $\pm$ 0.1  &  77.9 $\pm$ 0.1  &          85.2 $\pm$ 0.1  &  86.4 $\pm$ 0.1  &  88.4 $\pm$ 0.1  \\
   & 5  &  87.0 $\pm$ 0.1  &      64.5 $\pm$ 0.1  &  78.8 $\pm$ 0.1  &  81.7 $\pm$ 0.1  &          90.0 $\pm$ 0.1  &  89.7 $\pm$ 0.1  &  90.4 $\pm$ 0.1  \\
   & 7  &  88.7 $\pm$ 0.1  &      66.5 $\pm$ 0.1  &  80.9 $\pm$ 0.1  &  84.0 $\pm$ 0.1  &          92.6 $\pm$ 0.1  &  90.9 $\pm$ 0.1  &  91.5 $\pm$ 0.1  \\
   & 9  &  89.8 $\pm$ 0.1  &      68.4 $\pm$ 0.1  &  82.9 $\pm$ 0.1  &  85.5 $\pm$ 0.1  &          94.2 $\pm$ 0.1  &  92.0 $\pm$ 0.1  &  92.2 $\pm$ 0.1  \\
   & 11 &  90.3 $\pm$ 0.1  &      70.1 $\pm$ 0.1  &  84.3 $\pm$ 0.1  &  87.0 $\pm$ 0.1  &          95.3 $\pm$ 0.1  &  92.9 $\pm$ 0.1  &  93.0 $\pm$ 0.1  \\
   & 13 &  91.0 $\pm$ 0.1  &      71.6 $\pm$ 0.1  &  85.1 $\pm$ 0.1  &  87.7 $\pm$ 0.1  &          96.1 $\pm$ 0.1  &  93.4 $\pm$ 0.1  &  93.4 $\pm$ 0.1  \\
   & 15 &  91.2 $\pm$ 0.1  &      72.9 $\pm$ 0.1  &  86.0 $\pm$ 0.1  &  88.4 $\pm$ 0.1  &          96.8 $\pm$ 0.1  &  93.8 $\pm$ 0.1  &  93.8 $\pm$ 0.1  \\
   & 17 &  92.0 $\pm$ 0.1  &      74.3 $\pm$ 0.1  &  86.9 $\pm$ 0.1  &  89.2 $\pm$ 0.1  &          97.2 $\pm$ 0.1  &  94.2 $\pm$ 0.1  &  94.1 $\pm$ 0.1  \\
\cline{1-9}
\multirow{9}{*}{21} & 1  &  79.5 $\pm$ 0.1  &      74.1 $\pm$ 0.1  &  74.1 $\pm$ 0.1  &  74.1 $\pm$ 0.1  &          85.2 $\pm$ 0.1  &  85.2 $\pm$ 0.1  &  85.2 $\pm$ 0.1  \\
   & 3  &  86.3 $\pm$ 0.1  &      68.0 $\pm$ 0.1  &  77.4 $\pm$ 0.1  &  81.4 $\pm$ 0.1  &          87.0 $\pm$ 0.1  &  88.0 $\pm$ 0.1  &  90.1 $\pm$ 0.1  \\
   & 5  &  89.0 $\pm$ 0.1  &      68.6 $\pm$ 0.1  &  82.3 $\pm$ 0.1  &  85.0 $\pm$ 0.1  &          91.8 $\pm$ 0.1  &  91.1 $\pm$ 0.1  &  91.9 $\pm$ 0.1  \\
   & 7  &  90.5 $\pm$ 0.1  &      70.7 $\pm$ 0.1  &  84.2 $\pm$ 0.1  &  87.0 $\pm$ 0.1  &          93.9 $\pm$ 0.1  &  92.1 $\pm$ 0.1  &  92.8 $\pm$ 0.1  \\
   & 9  &  91.5 $\pm$ 0.1  &      72.4 $\pm$ 0.1  &  85.7 $\pm$ 0.1  &  88.1 $\pm$ 0.1  &          95.1 $\pm$ 0.1  &  93.1 $\pm$ 0.1  &  93.4 $\pm$ 0.1  \\
   & 11 &  92.0 $\pm$ 0.1  &      73.7 $\pm$ 0.1  &  87.0 $\pm$ 0.1  &  89.3 $\pm$ 0.1  &          96.2 $\pm$ 0.1  &  93.7 $\pm$ 0.1  &  94.0 $\pm$ 0.1  \\
   & 13 &  92.4 $\pm$ 0.1  &      75.0 $\pm$ 0.1  &  87.8 $\pm$ 0.1  &  90.1 $\pm$ 0.1  &          96.7 $\pm$ 0.1  &  94.2 $\pm$ 0.1  &  94.4 $\pm$ 0.1  \\
   & 15 &  92.7 $\pm$ 0.1  &      76.1 $\pm$ 0.1  &  88.4 $\pm$ 0.1  &  90.5 $\pm$ 0.1  &          97.4 $\pm$ 0.1  &  94.6 $\pm$ 0.1  &  94.6 $\pm$ 0.1  \\
   & 17 &  93.3 $\pm$ 0.1  &      77.3 $\pm$ 0.1  &  88.9 $\pm$ 0.1  &  91.2 $\pm$ 0.1  &          97.7 $\pm$ 0.1  &  94.9 $\pm$ 0.1  &  95.0 $\pm$ 0.1  \\
\bottomrule
\end{tabular}
\caption[The effect on reproducibility of varying the number of days incubated, the number of classifications and the consensus method.]{\label{table:S4} The effect on reproducibility of varying the number of days incubated, the number of classifications, $n$, and the consensus method. The standard error of the mean is given.}
\end{center}
\end{table}


\clearpage

\footnotesize
\begin{table}
\begin{center}
\begin{tabular}{rr|p{1.8cm}|p{1.6cm}p{1.6cm}p{1.6cm}|p{1.6cm}p{1.6cm}p{1.6cm}}
\toprule
   &    &       Prop. with & \multicolumn{3}{c}{Exact Agreement (\%)} & \multicolumn{3}{c}{Essential Agreement (\%)} \\
   &    &         MIC (\%) &                 Mean &           Median &             Mode &                     Mean &           Median &             Mode \\
Reading day & $n$ &                  &                      &                  &                  &                          &                  &                  \\
\midrule
\multirow{8}{*}{7} & 3  &  78.0 $\pm$ 0.1  &      67.6 $\pm$ 0.2  &  69.1 $\pm$ 0.2  &  74.0 $\pm$ 0.2  &          84.0 $\pm$ 0.1  &  85.8 $\pm$ 0.1  &  89.4 $\pm$ 0.1  \\
   & 5  &  78.5 $\pm$ 0.1  &      67.3 $\pm$ 0.1  &  70.1 $\pm$ 0.1  &  73.5 $\pm$ 0.1  &          86.5 $\pm$ 0.1  &  87.3 $\pm$ 0.1  &  89.2 $\pm$ 0.1  \\
   & 7  &  78.9 $\pm$ 0.1  &      67.9 $\pm$ 0.2  &  70.3 $\pm$ 0.1  &  73.7 $\pm$ 0.1  &          87.4 $\pm$ 0.1  &  87.6 $\pm$ 0.1  &  89.2 $\pm$ 0.1  \\
   & 9  &  78.9 $\pm$ 0.1  &      68.7 $\pm$ 0.1  &  70.6 $\pm$ 0.1  &  73.7 $\pm$ 0.1  &          87.6 $\pm$ 0.1  &  88.0 $\pm$ 0.1  &  89.2 $\pm$ 0.1  \\
   & 11 &  79.2 $\pm$ 0.1  &      69.1 $\pm$ 0.2  &  70.8 $\pm$ 0.1  &  73.8 $\pm$ 0.1  &          88.4 $\pm$ 0.1  &  88.3 $\pm$ 0.1  &  89.2 $\pm$ 0.1  \\
   & 13 &  79.2 $\pm$ 0.1  &      69.0 $\pm$ 0.1  &  70.7 $\pm$ 0.1  &  73.6 $\pm$ 0.1  &          88.6 $\pm$ 0.1  &  88.3 $\pm$ 0.1  &  89.1 $\pm$ 0.1  \\
   & 15 &  79.2 $\pm$ 0.1  &      68.8 $\pm$ 0.2  &  70.6 $\pm$ 0.1  &  73.5 $\pm$ 0.1  &          88.7 $\pm$ 0.1  &  88.3 $\pm$ 0.1  &  89.1 $\pm$ 0.1  \\
   & 17 &  79.4 $\pm$ 0.1  &      68.9 $\pm$ 0.1  &  71.6 $\pm$ 0.1  &  74.5 $\pm$ 0.1  &          88.3 $\pm$ 0.1  &  88.4 $\pm$ 0.1  &  89.1 $\pm$ 0.1  \\
\cline{1-9}
\multirow{8}{*}{10} & 3  &  91.7 $\pm$ 0.1  &      70.3 $\pm$ 0.1  &  73.4 $\pm$ 0.1  &  78.5 $\pm$ 0.1  &          84.0 $\pm$ 0.1  &  86.7 $\pm$ 0.1  &  90.4 $\pm$ 0.1  \\
   & 5  &  92.0 $\pm$ 0.1  &      69.3 $\pm$ 0.1  &  75.0 $\pm$ 0.1  &  78.4 $\pm$ 0.1  &          86.3 $\pm$ 0.1  &  88.4 $\pm$ 0.1  &  90.4 $\pm$ 0.1  \\
   & 7  &  92.0 $\pm$ 0.1  &      69.6 $\pm$ 0.1  &  75.4 $\pm$ 0.1  &  78.7 $\pm$ 0.1  &          87.3 $\pm$ 0.1  &  88.9 $\pm$ 0.1  &  90.5 $\pm$ 0.1  \\
   & 9  &  92.1 $\pm$ 0.1  &      70.1 $\pm$ 0.1  &  75.5 $\pm$ 0.1  &  78.7 $\pm$ 0.1  &          87.4 $\pm$ 0.1  &  89.2 $\pm$ 0.1  &  90.5 $\pm$ 0.1  \\
   & 11 &  92.2 $\pm$ 0.1  &      70.1 $\pm$ 0.1  &  75.8 $\pm$ 0.1  &  78.9 $\pm$ 0.1  &          87.9 $\pm$ 0.1  &  89.5 $\pm$ 0.1  &  90.6 $\pm$ 0.1  \\
   & 13 &  92.2 $\pm$ 0.1  &      70.0 $\pm$ 0.1  &  75.9 $\pm$ 0.1  &  78.7 $\pm$ 0.1  &          88.3 $\pm$ 0.1  &  89.7 $\pm$ 0.1  &  90.5 $\pm$ 0.1  \\
   & 15 &  92.1 $\pm$ 0.1  &      69.8 $\pm$ 0.1  &  75.9 $\pm$ 0.1  &  78.9 $\pm$ 0.1  &          88.4 $\pm$ 0.1  &  89.8 $\pm$ 0.1  &  90.6 $\pm$ 0.1  \\
   & 17 &  92.5 $\pm$ 0.1  &      69.6 $\pm$ 0.1  &  75.9 $\pm$ 0.1  &  78.7 $\pm$ 0.1  &          88.0 $\pm$ 0.1  &  89.5 $\pm$ 0.1  &  90.3 $\pm$ 0.1  \\
\cline{1-9}
\multirow{8}{*}{14} & 3  &  97.1 $\pm$ 0.1  &      69.9 $\pm$ 0.1  &  74.5 $\pm$ 0.1  &  80.0 $\pm$ 0.1  &          83.6 $\pm$ 0.1  &  86.7 $\pm$ 0.1  &  90.6 $\pm$ 0.1  \\
   & 5  &  97.2 $\pm$ 0.1  &      68.4 $\pm$ 0.1  &  76.4 $\pm$ 0.1  &  80.1 $\pm$ 0.1  &          86.3 $\pm$ 0.1  &  88.6 $\pm$ 0.1  &  90.7 $\pm$ 0.1  \\
   & 7  &  97.3 $\pm$ 0.1  &      68.1 $\pm$ 0.1  &  76.9 $\pm$ 0.1  &  80.5 $\pm$ 0.1  &          87.0 $\pm$ 0.1  &  89.0 $\pm$ 0.1  &  90.9 $\pm$ 0.1  \\
   & 9  &  97.3 $\pm$ 0.1  &      68.6 $\pm$ 0.1  &  77.2 $\pm$ 0.1  &  80.5 $\pm$ 0.1  &          87.5 $\pm$ 0.1  &  89.6 $\pm$ 0.1  &  90.9 $\pm$ 0.1  \\
   & 11 &  97.3 $\pm$ 0.1  &      68.9 $\pm$ 0.1  &  77.7 $\pm$ 0.1  &  80.9 $\pm$ 0.1  &          87.9 $\pm$ 0.1  &  89.9 $\pm$ 0.1  &  91.1 $\pm$ 0.1  \\
   & 13 &  97.4 $\pm$ 0.1  &      68.7 $\pm$ 0.1  &  77.9 $\pm$ 0.1  &  80.9 $\pm$ 0.1  &          88.3 $\pm$ 0.1  &  90.1 $\pm$ 0.1  &  91.1 $\pm$ 0.1  \\
   & 15 &  97.4 $\pm$ 0.1  &      68.5 $\pm$ 0.1  &  78.0 $\pm$ 0.1  &  80.9 $\pm$ 0.1  &          88.4 $\pm$ 0.1  &  90.2 $\pm$ 0.1  &  91.1 $\pm$ 0.1  \\
   & 17 &  97.4 $\pm$ 0.1  &      68.4 $\pm$ 0.1  &  78.1 $\pm$ 0.1  &  80.9 $\pm$ 0.1  &          88.5 $\pm$ 0.1  &  90.2 $\pm$ 0.1  &  91.0 $\pm$ 0.1  \\
\cline{1-9}
\multirow{8}{*}{21} & 3  &  98.9 $\pm$ 0.1  &      74.3 $\pm$ 0.1  &  79.3 $\pm$ 0.1  &  84.0 $\pm$ 0.1  &          86.3 $\pm$ 0.1  &  89.0 $\pm$ 0.1  &  92.3 $\pm$ 0.1  \\
   & 5  &  99.0 $\pm$ 0.1  &      73.1 $\pm$ 0.1  &  81.3 $\pm$ 0.1  &  84.5 $\pm$ 0.1  &          88.8 $\pm$ 0.1  &  90.7 $\pm$ 0.1  &  92.5 $\pm$ 0.1  \\
   & 7  &  99.0 $\pm$ 0.1  &      73.4 $\pm$ 0.1  &  81.9 $\pm$ 0.1  &  85.1 $\pm$ 0.1  &          89.6 $\pm$ 0.1  &  91.4 $\pm$ 0.1  &  92.9 $\pm$ 0.1  \\
   & 9  &  99.0 $\pm$ 0.1  &      73.7 $\pm$ 0.1  &  82.4 $\pm$ 0.1  &  85.2 $\pm$ 0.1  &          89.8 $\pm$ 0.1  &  91.7 $\pm$ 0.1  &  92.9 $\pm$ 0.1  \\
   & 11 &  99.0 $\pm$ 0.1  &      73.5 $\pm$ 0.1  &  82.7 $\pm$ 0.1  &  85.5 $\pm$ 0.1  &          90.2 $\pm$ 0.1  &  92.1 $\pm$ 0.1  &  93.1 $\pm$ 0.1  \\
   & 13 &  99.0 $\pm$ 0.1  &      73.8 $\pm$ 0.1  &  83.0 $\pm$ 0.1  &  85.6 $\pm$ 0.1  &          90.5 $\pm$ 0.1  &  92.4 $\pm$ 0.1  &  93.2 $\pm$ 0.1  \\
   & 15 &  99.0 $\pm$ 0.1  &      73.5 $\pm$ 0.1  &  83.2 $\pm$ 0.1  &  85.6 $\pm$ 0.1  &          90.6 $\pm$ 0.1  &  92.5 $\pm$ 0.1  &  93.2 $\pm$ 0.1  \\
   & 17 &  99.0 $\pm$ 0.1  &      73.3 $\pm$ 0.1  &  83.2 $\pm$ 0.1  &  85.6 $\pm$ 0.1  &          90.6 $\pm$ 0.1  &  92.6 $\pm$ 0.1  &  93.3 $\pm$ 0.1  \\
\bottomrule
\end{tabular}
\caption[The effect on accuracy of varying the number of days incubated, the number of classifications and the consensus method.]{\label{table:S4} The effect on accuracy of varying the number of days incubated, the number of classifications, $n$, and the consensus method. The standard error of the mean is given.}
\end{center}
\end{table}


\clearpage


\begin{table}
\begin{center}
\begin{tabular}{rr|rp{1.8cm}|p{1.6cm}p{1.6cm}p{1.6cm}|p{1.6cm}p{1.6cm}p{1.6cm}}
\toprule
   &    & Average & Prop. with & \multicolumn{3}{c}{Exact Agreement (\%)} & \multicolumn{3}{c}{Essential Agreement (\%)} \\
   &    &     $n$ &   MIC (\%) &                 Mean & Median & Mode &                     Mean & Median & Mode \\
Reading day & $n$ &         &            &                      &        &      &                          &        &      \\
\midrule
\multirow{8}{*}{14} & 3  &     3.0 &       95.1 &                 81.4 &   79.1 & 81.7 &                     92.6 &   89.3 & 90.4 \\
   & 5  &     3.9 &       96.6 &                 79.0 &   82.7 & 84.4 &                     93.1 &   91.4 & 91.6 \\
   & 7  &     4.7 &       97.1 &                 80.0 &   83.6 & 85.7 &                     94.4 &   92.1 & 92.1 \\
   & 9  &     5.6 &       97.4 &                 80.8 &   84.6 & 86.6 &                     95.3 &   92.8 & 92.7 \\
   & 11 &     6.5 &       97.6 &                 82.0 &   85.5 & 87.3 &                     96.1 &   93.3 & 93.1 \\
   & 13 &     7.3 &       97.8 &                 82.8 &   86.1 & 88.0 &                     96.6 &   93.7 & 93.4 \\
   & 15 &     8.2 &       98.0 &                 83.3 &   86.6 & 88.5 &                     96.9 &   93.9 & 93.7 \\
   & 17 &     8.8 &       98.2 &                 84.5 &   87.6 & 89.4 &                     97.3 &   94.4 & 94.1 \\
\bottomrule
\end{tabular}
\caption[Reproducibility when applying early halting]{\label{table:S7} The effect on reproducibility of dynamically retiring images if the first three classifications are identical and continuing the remainder until they have accrued $n$ classifications.}
\end{center}
\end{table}

\begin{table}
\begin{center}
\begin{tabular}{rr|rp{1.8cm}|p{1.6cm}p{1.6cm}p{1.6cm}|p{1.6cm}p{1.6cm}p{1.6cm}}
\toprule
   &    & Average & Prop. with & \multicolumn{3}{c}{Exact Agreement (\%)} & \multicolumn{3}{c}{Essential Agreement (\%)} \\
   &    &     $n$ &   MIC (\%) &                 Mean & Median & Mode &                     Mean & Median & Mode \\
Reading day & $n$ &         &            &                      &        &      &                          &        &      \\
\midrule
\multirow{8}{*}{14} & 3  &     3.0 &       97.2 &                 69.9 &   74.5 & 80.0 &                     83.6 &   86.7 & 90.6 \\
   & 5  &     3.8 &       96.9 &                 74.4 &   77.7 & 80.2 &                     88.1 &   89.2 & 90.6 \\
   & 7  &     4.6 &       97.0 &                 74.1 &   77.8 & 80.4 &                     88.5 &   89.5 & 90.7 \\
   & 9  &     5.4 &       97.0 &                 74.2 &   77.9 & 80.4 &                     88.6 &   89.8 & 90.7 \\
   & 11 &     6.2 &       97.0 &                 74.4 &   78.2 & 80.6 &                     88.9 &   90.0 & 90.8 \\
   & 13 &     7.0 &       97.1 &                 74.4 &   78.3 & 80.5 &                     89.1 &   90.1 & 90.8 \\
   & 15 &     7.8 &       97.1 &                 74.2 &   78.3 & 80.6 &                     89.1 &   90.2 & 90.8 \\
   & 17 &     8.4 &       97.1 &                 74.8 &   78.8 & 80.9 &                     89.4 &   90.3 & 90.9 \\
\bottomrule
\end{tabular}
\caption[Accuracy when applying early halting]{\label{table:S8} The effect on accuracy of dynamically retiring images if the first three classifications are identical and continuing the remainder until they have accrued $n$ classifications.}
\end{center}
\end{table}


\clearpage
\begin{table}
\begin{center}
\begin{tabular}{r|r}
\toprule
Dilution &        Agreement \\
\midrule
      NR & 20.0 $\pm$ 0.1 \% \\
       1 & 83.9 $\pm$ 0.1 \% \\
       2 & 72.0 $\pm$ 0.1 \% \\
       3 & 66.6 $\pm$ 0.1 \% \\
       4 & 48.2 $\pm$ 0.1 \% \\
       5 & 53.4 $\pm$ 0.1 \% \\
       6 & 52.6 $\pm$ 0.1 \% \\
       7 & 42.8 $\pm$ 0.1 \% \\
       8 & 46.7 $\pm$ 0.1 \% \\
       9 & 21.1 $\pm$ 0.2 \% \\
\bottomrule
\end{tabular}
\caption[The Expert and BashTheBug MICs are more likely to concur at smaller dilutions.]{\label{table:S9} The Expert and BashTheBug MICs are more likely to concur at smaller dilutions. The BashTheBug consensus measurement was built by taking the median of 17 classifications and rounding up if a non-integer was returned. The standard error of the mean is given.}
\end{center}
\end{table}


\clearpage
\section*{MEMBERS OF CRyPTIC CONSORTIUM}
\normalsize

Ivan Barilar$^{29}$, Simone Battaglia$^1$, Emanuele Borroni$^1$, Angela Pires Brandao$^{2,3}$, Alice Brankin$^{4}$, Andrea Maurizio Cabibbe$^{1}$, Joshua Carter$^{5}$, Darren Chetty$^{30}$, Daniela Maria Cirillo$^{1}$, Pauline Claxton$^{6}$, David A Clifton$^{4}$, Ted Cohen$^{7}$, Jorge Coronel$^{8}$, Derrick W Crook$^{4}$,  Viola Dreyer$^{29}$, Sarah G Earle$^{4}$, Vincent Escuyer$^{9}$, Lucilaine Ferrazoli$^{3}$, Philip W Fowler$^{4}$, George Fu Gao$^{10}$, Jennifer Gardy$^{11}$, Saheer Gharbia$^{12}$, Kelen Teixeira Ghisi$^{3}$, Arash Ghodousi$^{1,13}$, Ana Lu\'{i}za Gibertoni Cruz$^{4}$, Louis Grandjean$^{33}$, Clara Grazian$^{14}$, Ramona Groenheit$^{44}$, Jennifer L Guthrie$^{15,16}$, Wencong He$^{10}$, Harald Hoffmann$^{17,18}$, Sarah J Hoosdally$^{4}$, Martin Hunt$^{4,19}$, Zamin Iqbal$^{19}$, Nazir Ahmed Ismail$^{20}$, Lisa Jarrett$^{21}$, Lavania Joseph$^{20}$, Ruwen Jou$^{22}$, Priti Kambli$^{23}$, Rukhsar Khot$^{23}$, Jeff Knaggs$^{4,19}$, Anastasia Koch$^{24}$, Donna Kohlerschmidt$^{9}$, Samaneh Kouchaki$^{4,25}$, Alexander S Lachapelle$^{4}$, Ajit Lalvani$^{26}$, Simon Grandjean Lapierre$^{27}$, Ian F Laurenson$^{6}$, Brice Letcher$^{19}$, Wan-Hsuan Lin$^{22}$, Chunfa Liu$^{10}$, Dongxin Liu$^{10}$, Kerri M Malone$^{19}$, Ayan Mandal$^{28}$, Mikael Mansj\"{o}$^{44}$, Daniela Matias$^{21}$, Graeme Meintjes$^{24}$, Fl\'{a}via de Freitas Mendes$^{3}$, Matthias Merker$^{29}$, Marina Mihalic$^{18}$, James Millard$^{30}$, Paolo Miotto$^{1}$, Nerges Mistry$^{28}$, David Moore$^{8,31}$, Kimberlee A Musser$^{9}$, Dumisani Ngcamu$^{20}$, Hoang Ngoc Nhung$^{32}$, Stefan Niemann$^{29,48}$, Kayzad Soli Nilgiriwala$^{28}$, Camus Nimmo$^{33}$, Max O'Donnell$^{49}$, Nana Okozi$^{20}$, Rosangela Siqueira Oliveira$^{3}$, Shaheed Vally Omar$^{20}$, Nicholas Paton$^{34}$, Timothy EA Peto$^{4}$, Juliana Maira Watanabe Pinhata$^{3}$, Sara Plesnik$^{18}$, Zully M Puyen$^{35}$, Marie Sylvianne Rabodoarivelo$^{36}$, Niaina Rakotosamimanana$^{36}$, Paola MV Rancoita$^{13}$, Priti Rathod$^{21}$, Esther Robinson$^{21}$, Gillian Rodger$^{4}$, Camilla Rodrigues$^{23}$, Timothy C Rodwell$^{37,38}$, Aysha Roohi$^{4}$, David Santos-Lazaro$^{35}$, Sanchi Shah$^{28}$, Thomas Andreas Kohl$^{29}$, Grace Smith$^{12,21}$, Walter Solano$^{8}$, Andrea Spitaleri$^{1,13}$, Philip Supply$^{39}$, Adrie JC Steyn$^{30}$, Utkarsha Surve$^{23}$, Sabira Tahseen$^{40}$, Nguyen Thuy Thuong Thuong$^{32}$, Guy Thwaites$^{4,32}$, Katharina Todt$^{18}$, Alberto Trovato$^{1}$, Christian Utpatel$^{29}$, Annelies Van Rie$^{41}$, Srinivasan Vijay$^{42}$, Timothy M Walker$^{4,32}$, A Sarah Walker$^{4}$, Robin Warren$^{43}$, Jim Werngren$^{44}$, Maria Wijkander$^{44}$, Robert J Wilkinson$^{26,45,46}$, Daniel J Wilson$^{4}$, Penelope Wintringer$^{19}$, Yu-Xin Xiao$^{22}$, Yang Yang$^{4}$, Zhao Yanlin$^{10}$, Shen-Yuan Yao$^{20}$, Baoli Zhu$^{47}$.\\

%\small
%\sffamily
\subsection*{Affiliations}
\begin{enumerate}
\item IRCCS San Raffaele Scientific Institute, Milan, Italy
\item Oswaldo Cruz Foundation, Rio de Janeiro, Brazil 
\item Institute Adolfo Lutz, S\~{a}o Paulo, Brazil
\item University of Oxford, Oxford, UK
\item Stanford University School of Medicine, Stanford, USA
\item Scottish Mycobacteria Reference Laboratory, Edinburgh, UK
\item Yale School of Public Health, Yale, USA
\item Universidad Peruana Cayetano Heredia, Lima, Per\'{u} 
\item Wadsworth Center, New York State Department of Health, Albany, USA
\item Chinese Center for Disease Control and Prevention, Beijing, China
\item Bill \& Melinda Gates Foundation, Seattle, USA
\item UK Health Security Agency, London, UK
\item Vita-Salute San Raffaele University, Milan, Italy
\item University of New South Wales, Sydney, Australia 
\item The University of British Columbia, Vancouver, Canada
\item Public Health Ontario, Toronto, Canada
\item SYNLAB Gauting, Munich, Germany
\item Institute of Microbiology and Laboratory Medicine, IMLred, WHO-SRL Gauting, Germany
\item EMBL-EBI, Hinxton, UK
\item National Institute for Communicable Diseases, Johannesburg, South Africa
\item UK Health Security Agency, Birmingham, UK
\item Taiwan Centers for Disease Control, Taipei, Taiwan
\item Hinduja Hospital, Mumbai, India 
\item University of Cape Town, Cape Town, South Africa
\item University of Surrey, Guildford, UK
\item Imperial College, London, UK
\item Universit\'{e} de Montr\'{e}al, Canada
\item The Foundation for Medical Research, Mumbai, India
\item Research Center Borstel, Borstel, Germany
\item Africa Health Research Institute, Durban, South Africa
\item London School of Hygiene and Tropical Medicine, London, UK
\item Oxford University Clinical Research Unit, Ho Chi Minh City, Viet Nam
\item University College London, London, UK
\item National University of Singapore, Singapore  
\item Instituto Nacional de Salud, Lima, Per\'{u}
\item Institut Pasteur de Madagascar, Antananarivo, Madagascar
\item FIND, Geneva, Switzerland
\item University of California, San Diego, USA
\item Institut Pasteur de Lille, Lille, France
\item National TB Reference Laboratory, National TB Control Program, Islamabad, Pakistan 
\item University of Antwerp, Antwerp, Belgium
\item University of Edinburgh, Edinburgh, UK
\item Stellenbosch University, Cape Town, South Africa
\item Public Health Agency of Sweden, Solna, Sweden
\item Wellcome Centre for Infectious Diseases Research in Africa, Cape Town, South Africa
\item Francis Crick Institute, London, UK
\item Institute of Microbiology, Chinese Academy of Sciences, Beijing, China
\item German Center for Infection Research (DZIF), Hamburg-L\"{u}beck-Borstel-Riems, Germany
\item Colombia University Irving Medical Center, New York, USA
\end{enumerate}


%
%
%\clearpage
%\subsection*{References}
%\small
%\sffamily
%\bibliography{/Users/fowler/Dropbox/sync/bibtex/paper-bashthebug}


\end{document}
