# Supplementary figures and images for: A crowd of BashTheBug volunteers reproducibly and accurately measure the minimum inhibitory concentrations of 13 antitubercular drugs from photographs of 96-well broth microdilution plates
Source: eLife journal article supplement (doi:10.7554/elife.75046), 2022-05-19

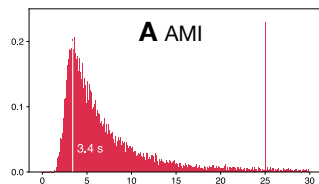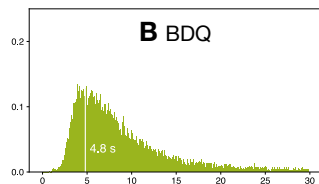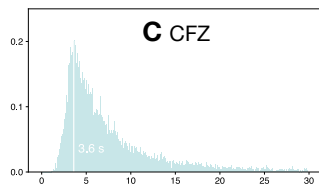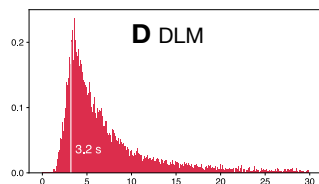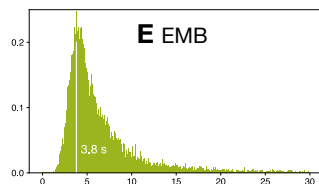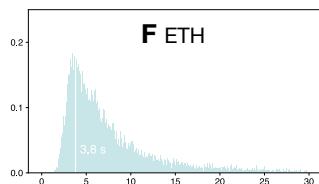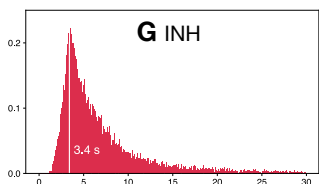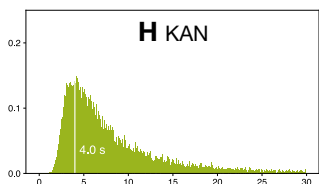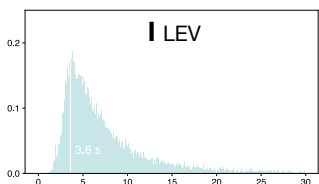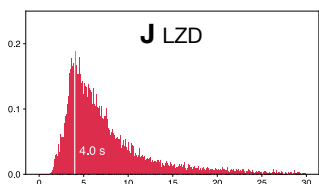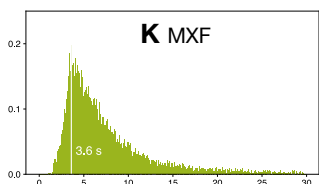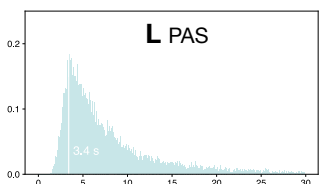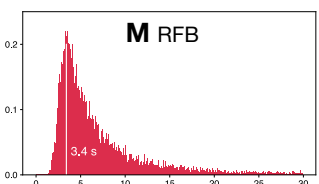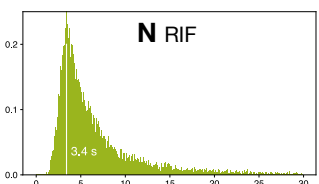

Supplement: supp [file elife-75046-supp-v2.zip › elife_poa_e75046_Figure_1_figure_supplement_3.pdf]

**A**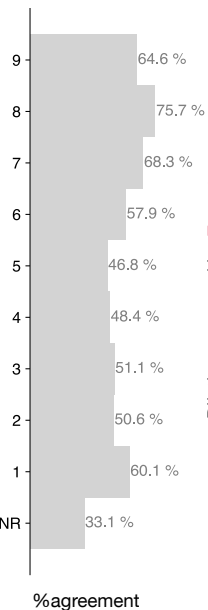**B**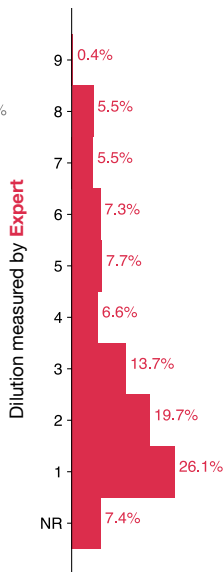**D**All individual classifications made by **BashTheBug** volunteers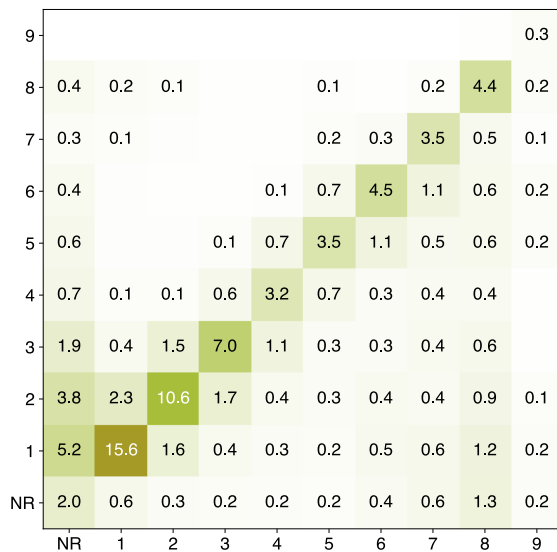**C**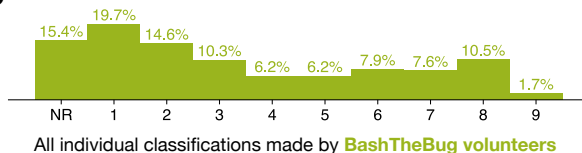

Supplement: supp [file elife-75046-supp-v2.zip › elife_poa_e75046_Figure_2_figure_supplement_1.pdf]

## A reproducibility after 14 days incubation

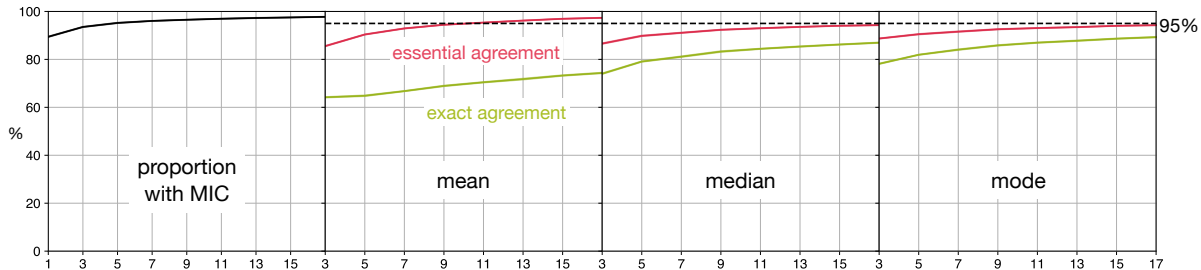

## B accuracy after 14 days incubation

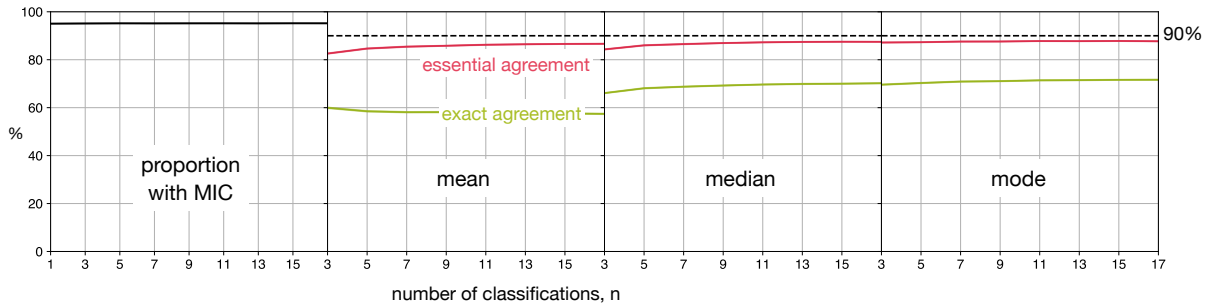

Supplement: supp [file elife-75046-supp-v2.zip › elife_poa_e75046_Figure_4_figure_supplement_1.pdf]

# A reproducibility after 7 days incubation

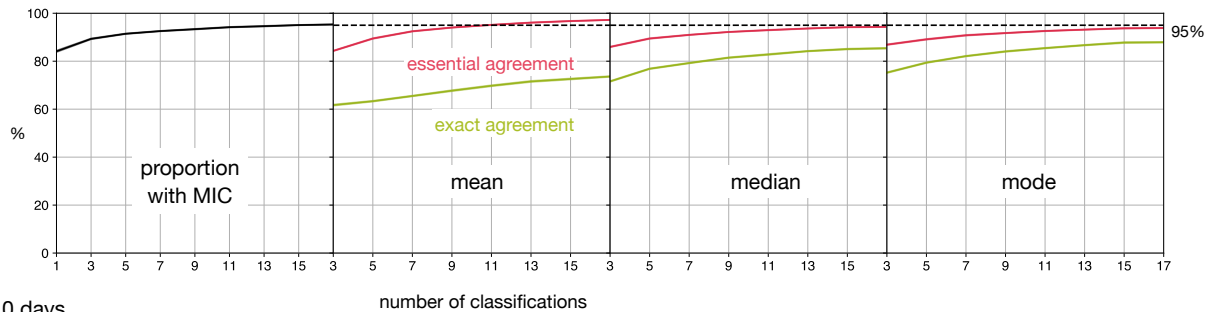

# B 10 days

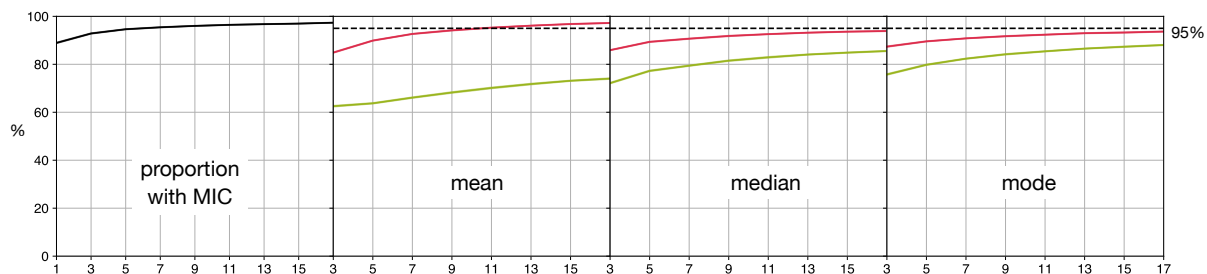

# C 14 days

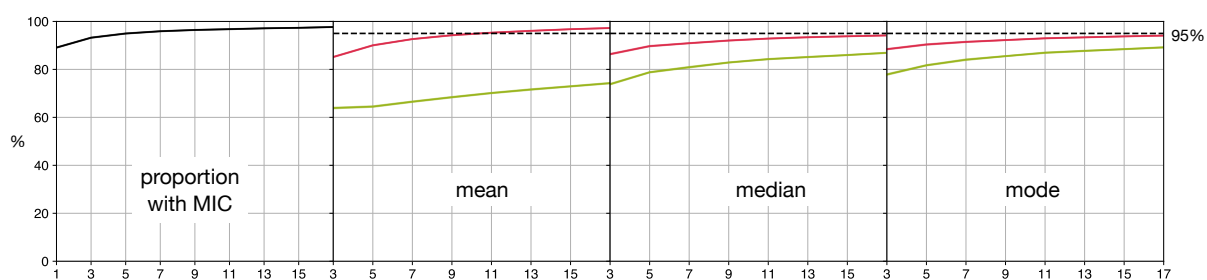

# D 21 days

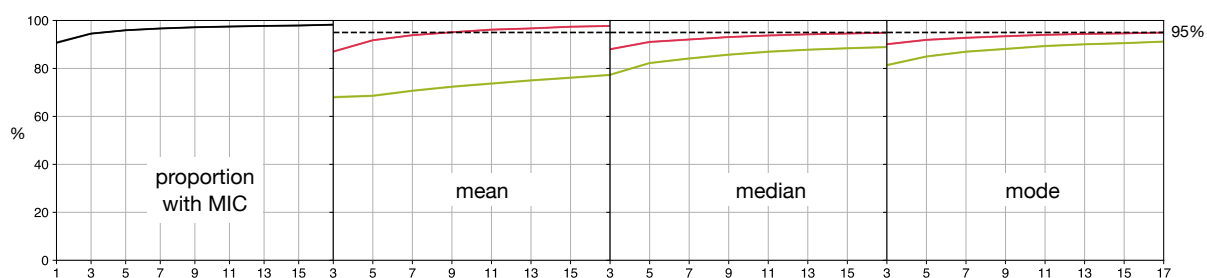

Supplement: supp [file elife-75046-supp-v2.zip › elife_poa_e75046_Figure_4_figure_supplement_2.pdf]

# A accuracy after 7 days incubation

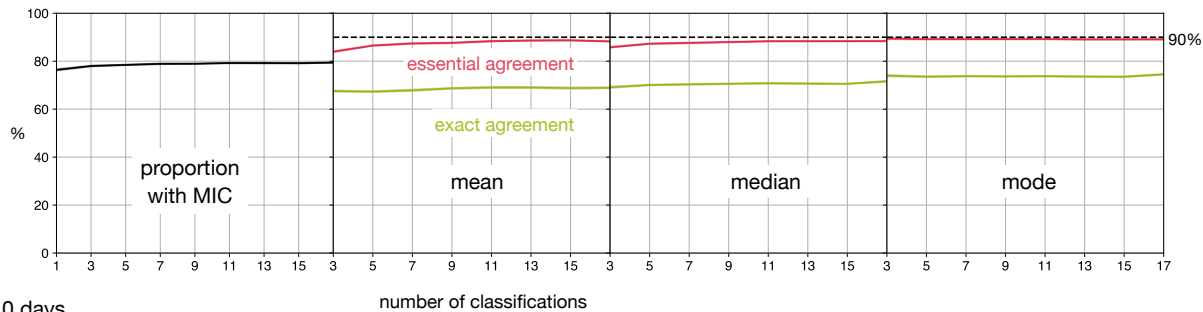

# B 10 days

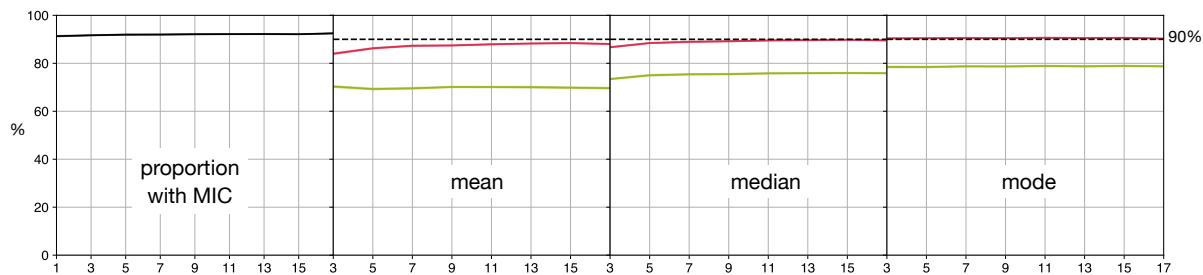

# C 14 days

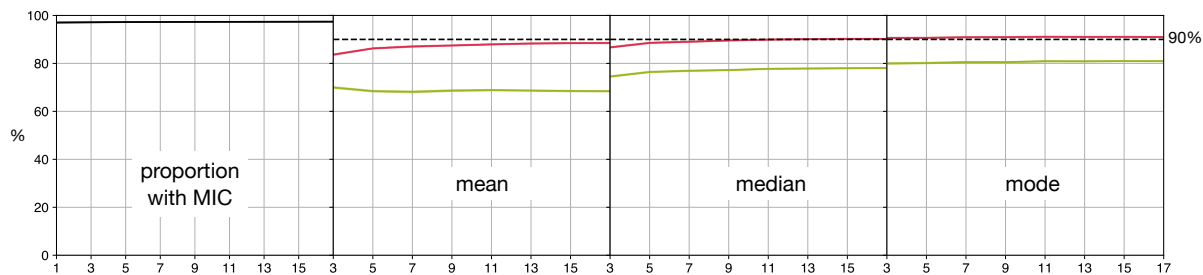

# D 21 days

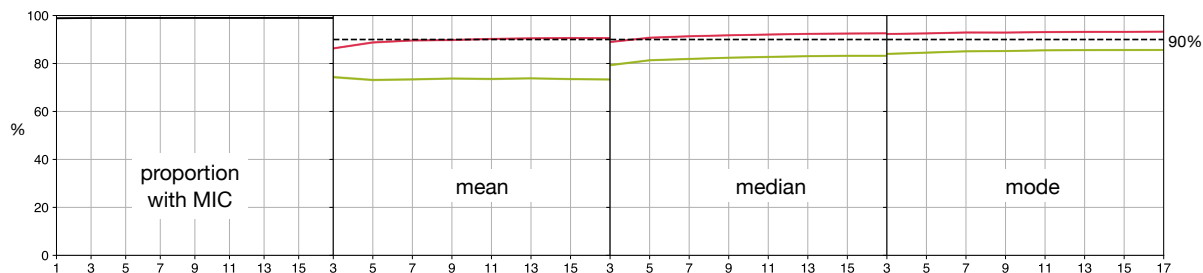

Supplement: supp [file elife-75046-supp-v2.zip › elife_poa_e75046_Figure_4_figure_supplement_3.pdf]

## UKMYC5 plate design

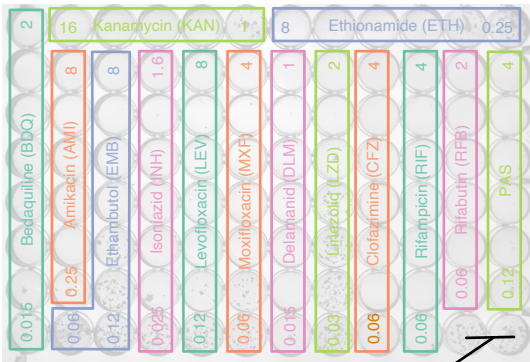

Supplement: supp [file elife-75046-supp-v2.zip › elife_poa_e75046_Figure_6_figure_supplement_1.pdf]

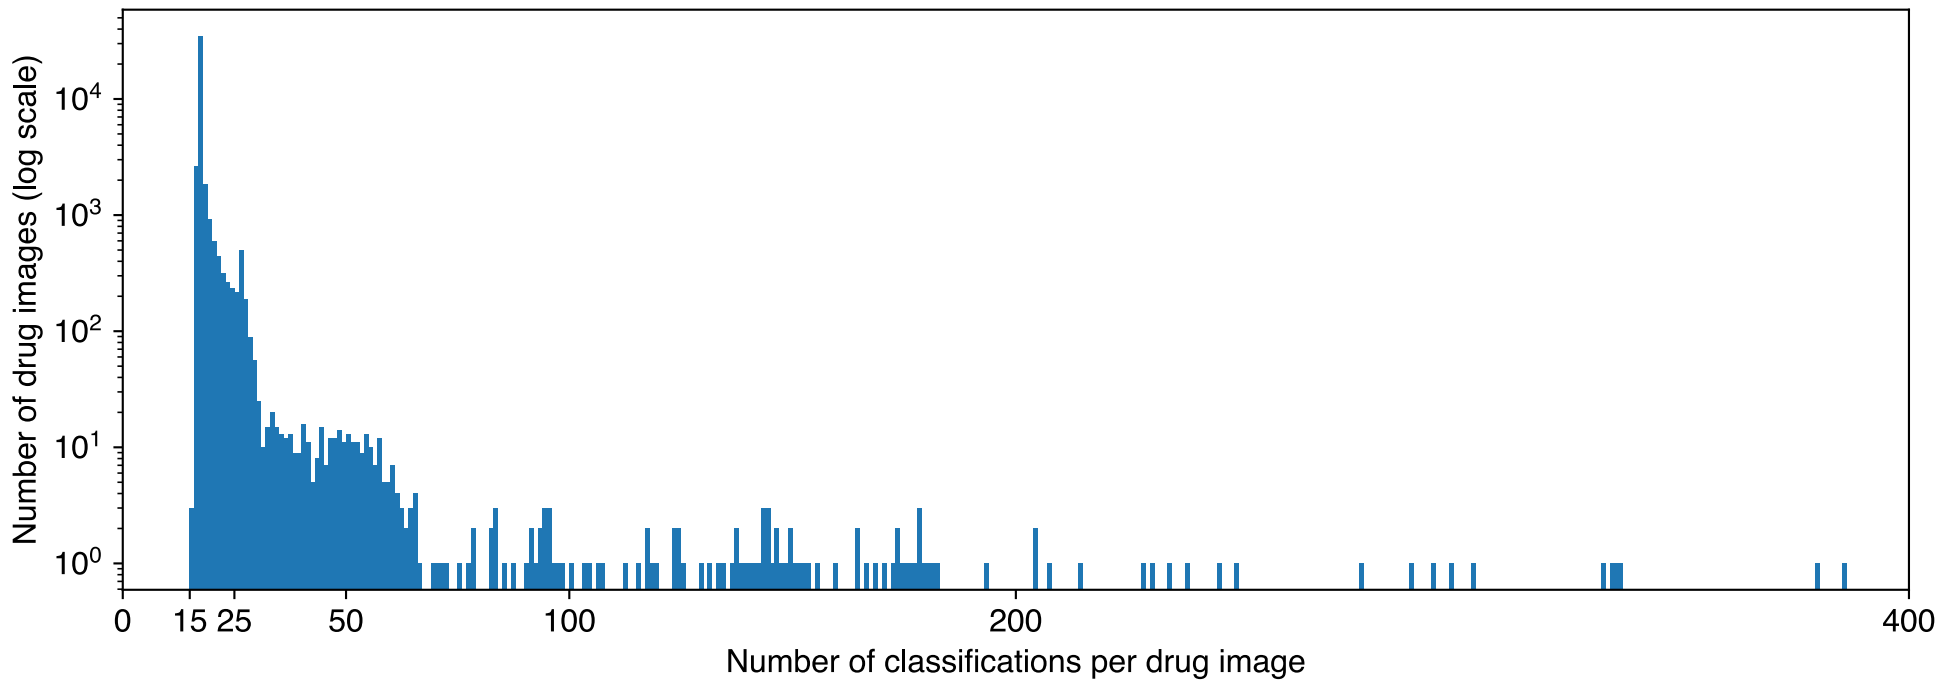

Supplement: supp [file elife-75046-supp-v2.zip › elife_poa_e75046_Figure_6_figure_supplement_2.pdf]

**A** Expert+AMyGDA dataset

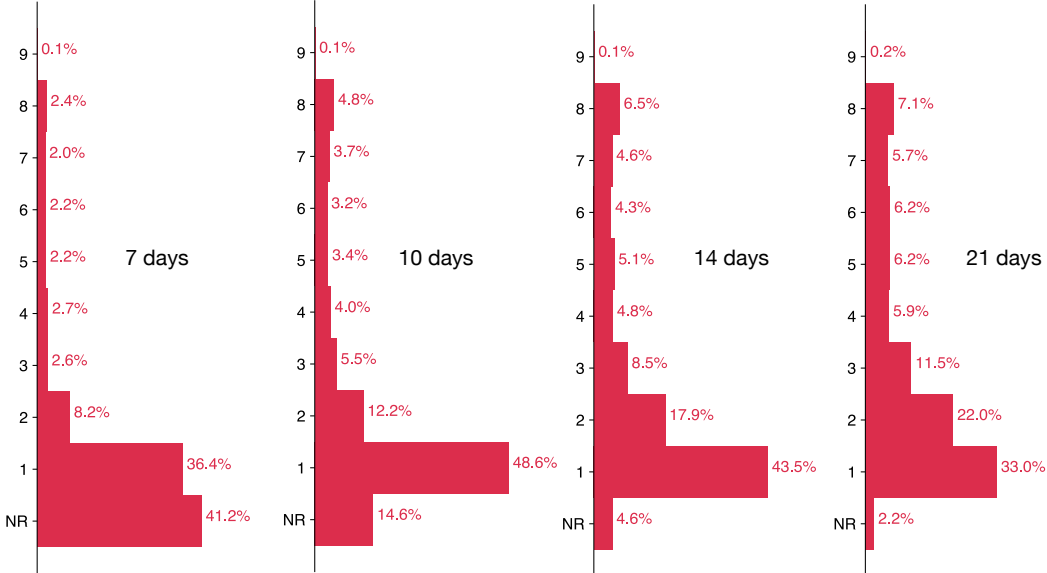

**B** Expert dataset

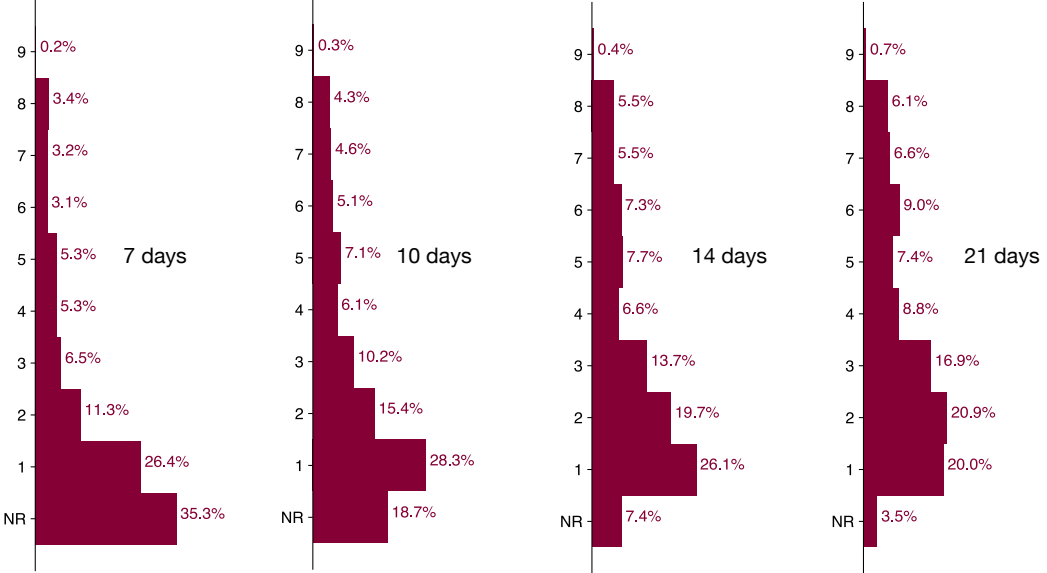

Supplement: supp [file elife-75046-supp-v2.zip › elife_poa_e75046_Figure_6_figure_supplement_4.pdf]

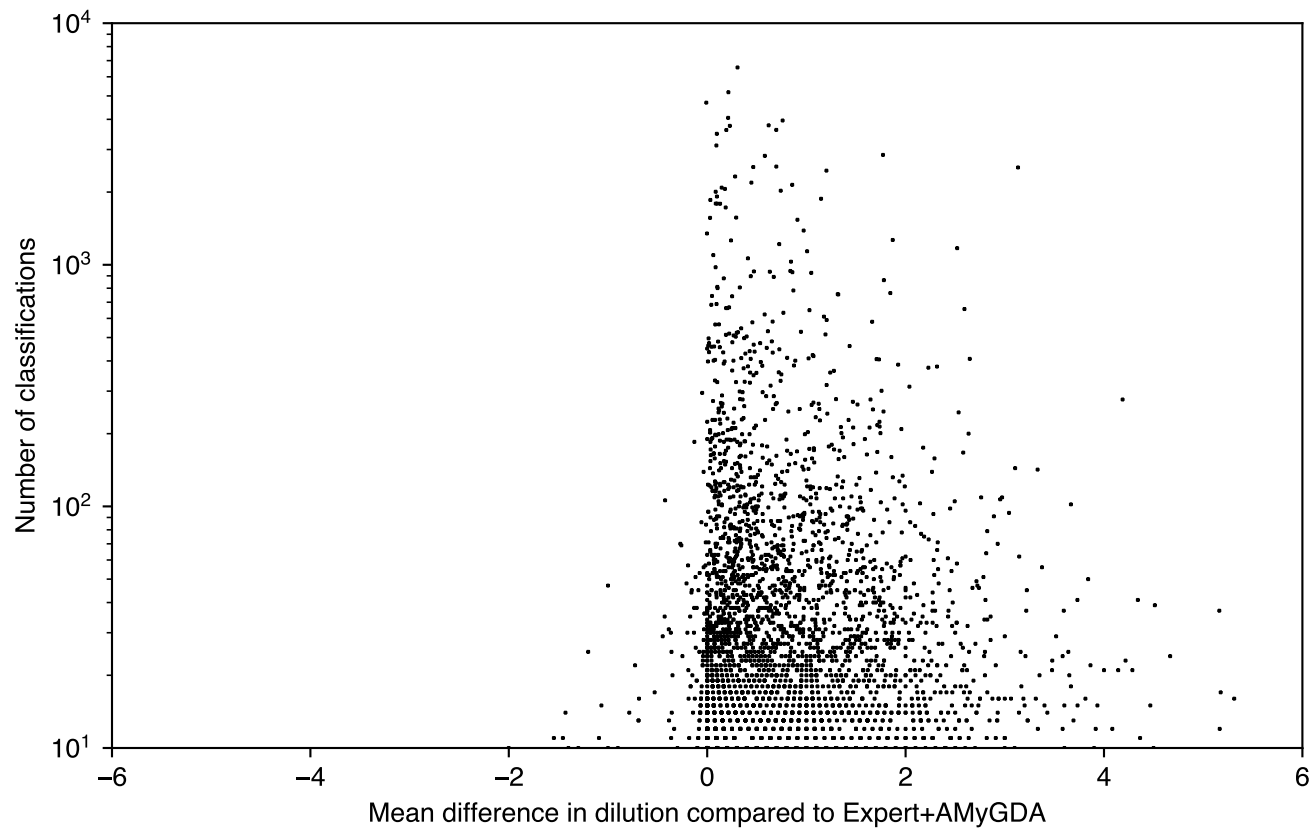

Supplement: supp [file elife-75046-supp-v2.zip › elife_poa_e75046_Figure_6_figure_supplement_5.pdf]
